# Supplementary material for: Promotion mechanism of –OH group intercalation for NOx purification on BiOI photocatalyst
Source: Royal Society of Chemistry journal article supplement (doi:10.1039/d1nr05363a), 2021-01-01
Supplement: d1nr05363a1.pdf [file d1nr05363a1.pdf]

**Supplementary Material for**  
**Promotion mechanism of -OH group intercalation for NO<sub>x</sub> purification on BiOI**  
**photocatalyst**

Weiping Yang<sup>a</sup>, Qin Ren<sup>a</sup>, Fengyi Zhong<sup>a</sup>, Yanxia Wang<sup>a</sup>, Jielin Wang<sup>a</sup>, Ruimin Chen<sup>a</sup>, Jieyuan Li<sup>a</sup>,  
Fan Dong<sup>a, b</sup>\*

a. Research Center for Environmental and Energy Catalysis, Institute of Fundamental and Frontier Sciences, University of Electronic Science and Technology of China, Chengdu 611731, China.

b. Yangtze Delta Region Institute (Huzhou), University of Electronic Science and Technology of China, Huzhou, 313000 China.

\*Corresponding Author

Jieyuan Li (jieyli@uestc.edu.cn)

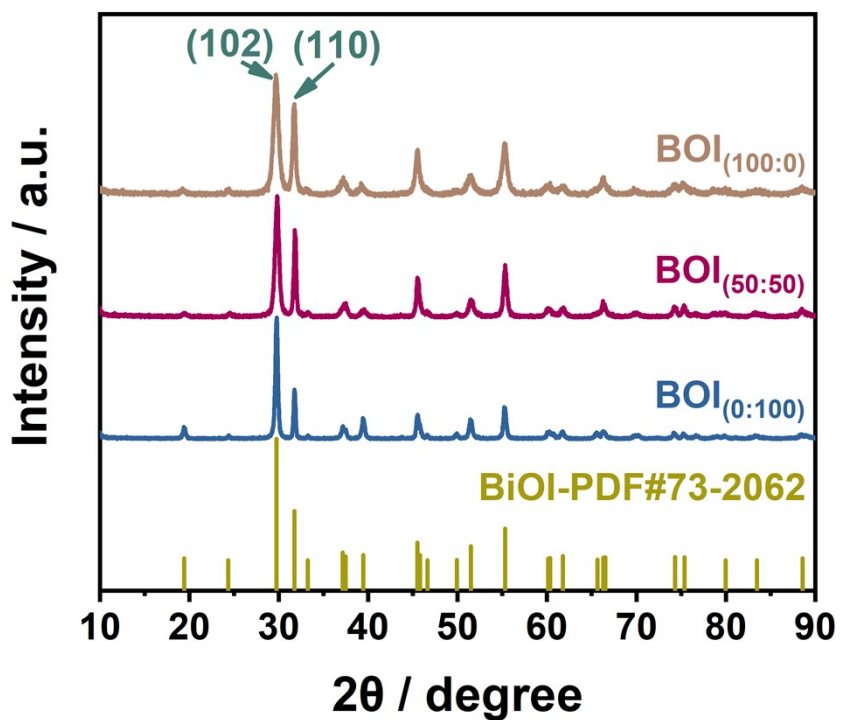

Figure S1. Whole XRD patterns of the photocatalytic materials.

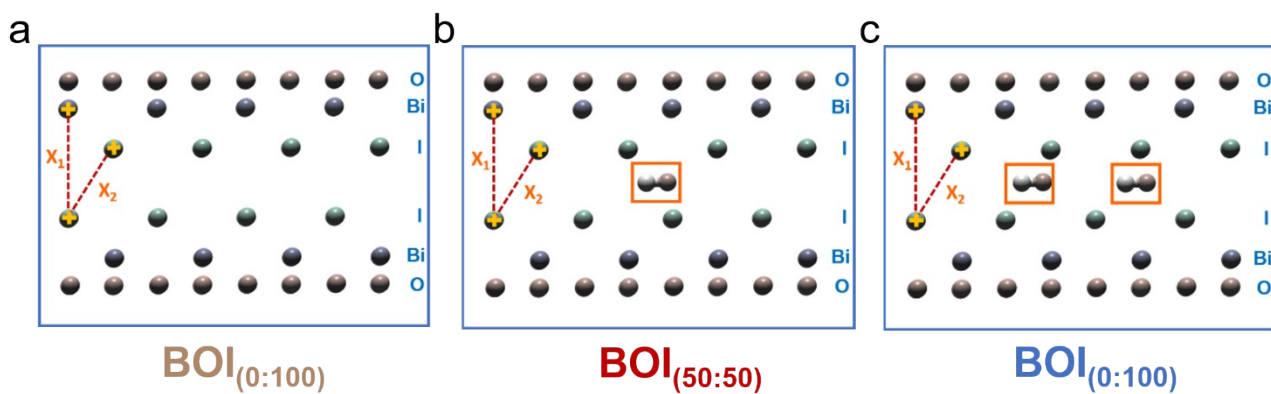

Figure S2. Structure cell with DFT calculation of  $\text{BOI}_{(0:100)}$ ,  $\text{BOI}_{(50:50)}$  and  $\text{BOI}_{(100:0)}$ .

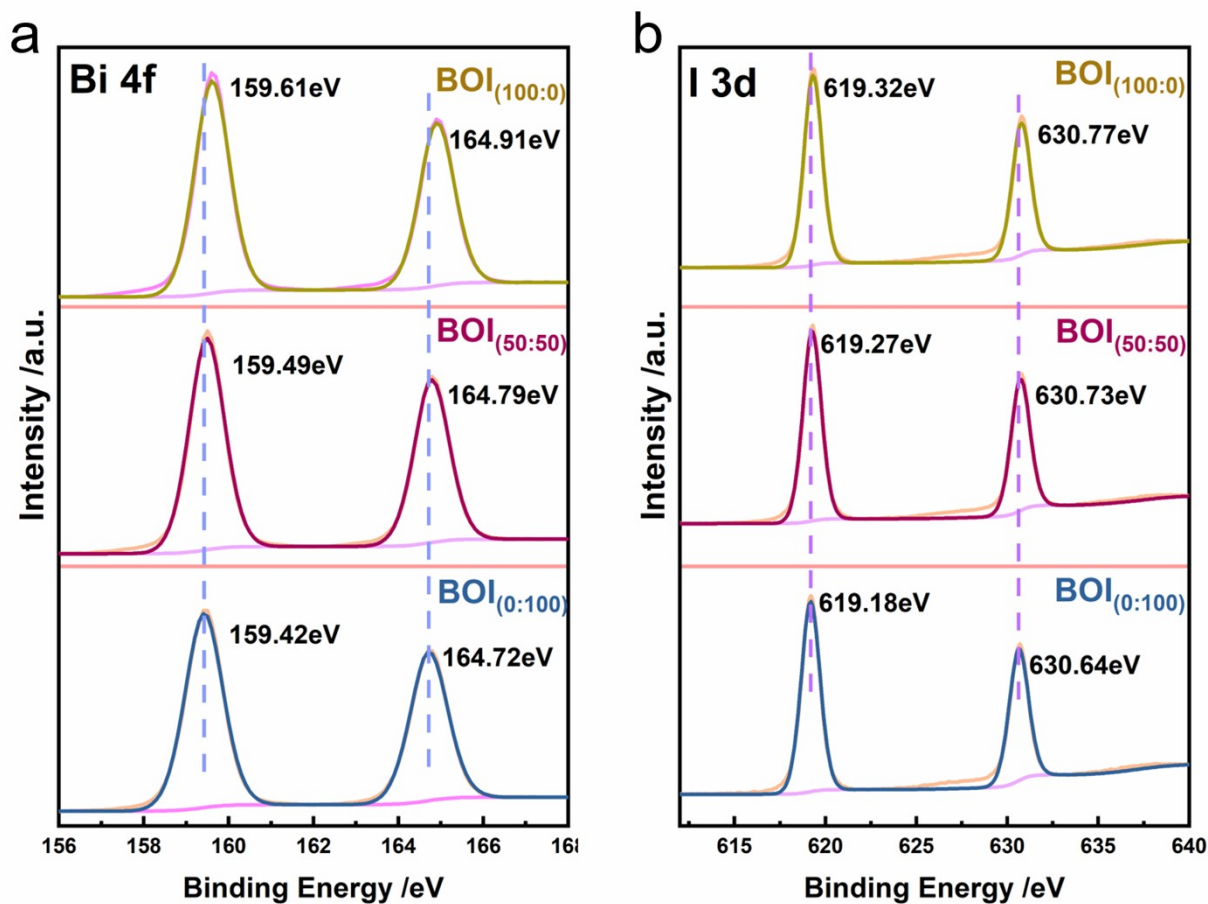

Figure S3. XPS spectra of the peaks of the Bi 4f (a), I 3d (b).

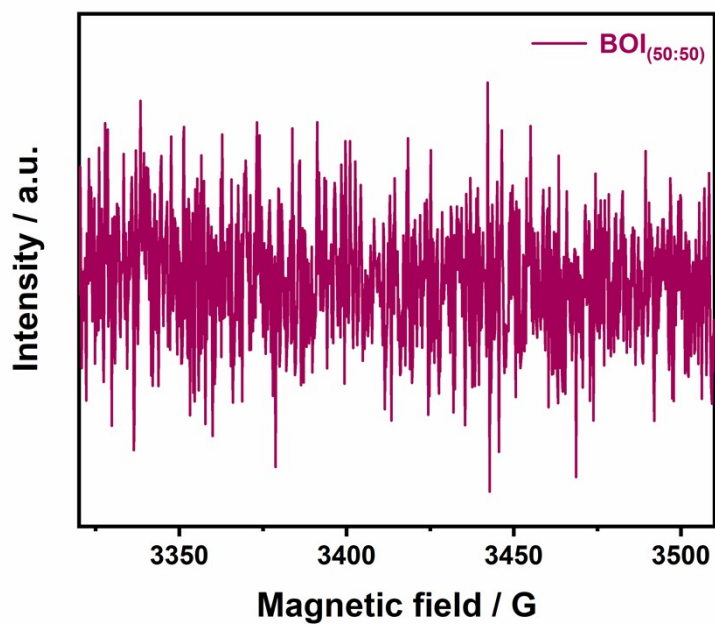

Figure S4. EPR spectra of BOI<sub>(50:50)</sub>.

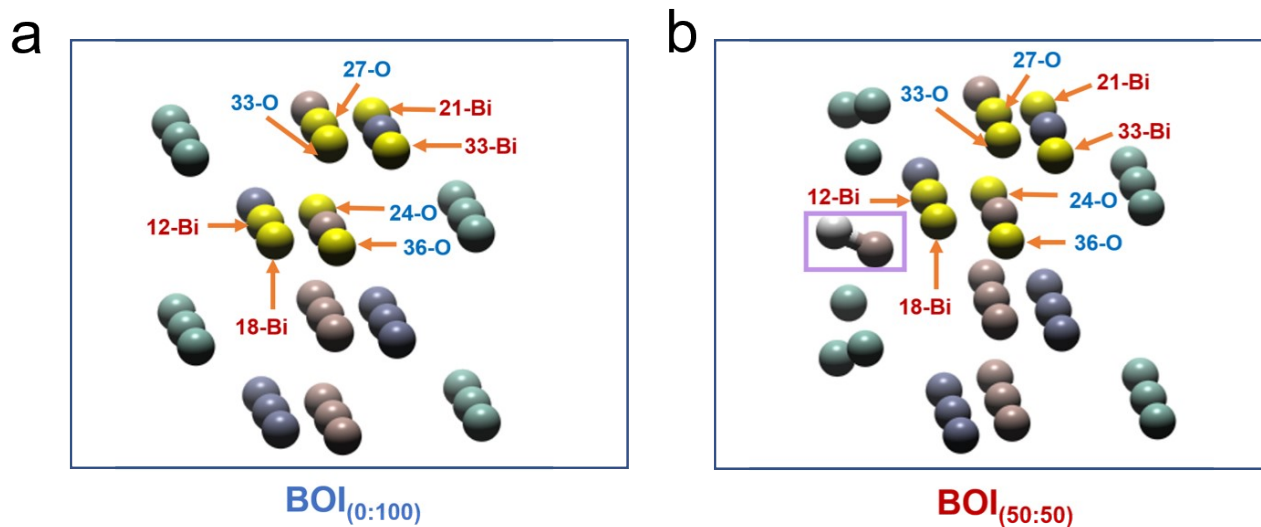

Figure S5. Selective atoms for Bi-O bonds calculation.

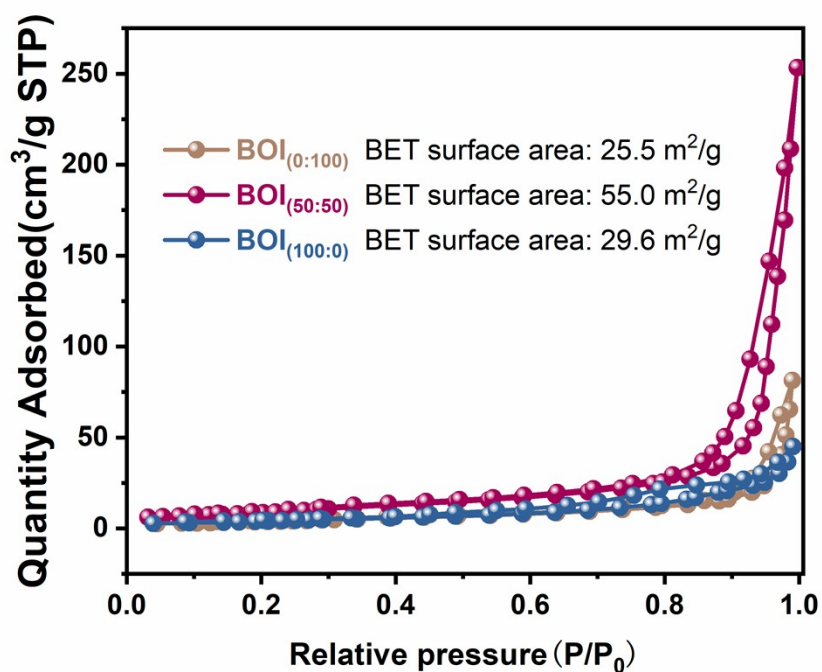

Figure S6. The specific surface area of BOI<sub>(0:100)</sub>, BOI<sub>(50:50)</sub>, BOI<sub>(100:0)</sub>.

The NO<sub>2</sub> production was calculated from

$$\Delta = c/c_0 \times 100\% \quad (\text{S1})$$

In this formula,  $c$  and  $c_0$  represent the original concentration and the concentration after 30 minutes reaction of NO<sub>2</sub>, correspondingly.

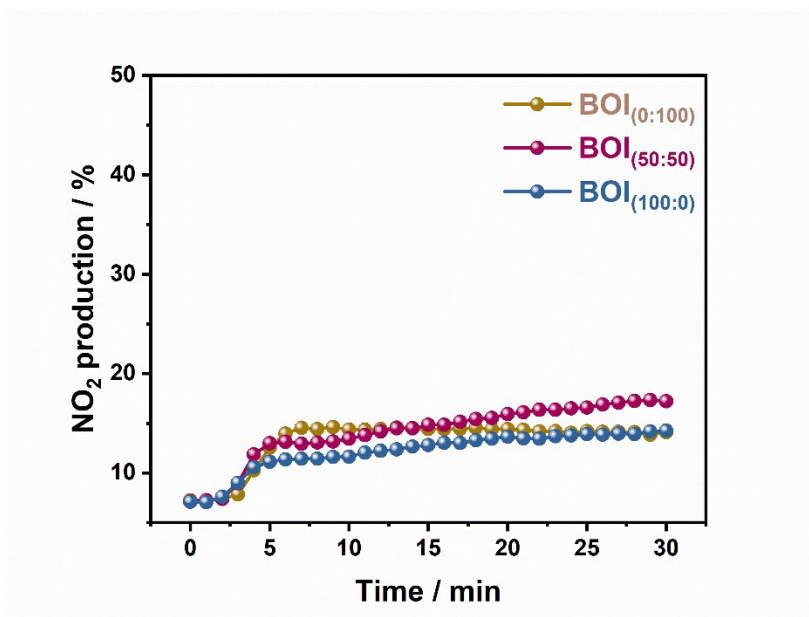

**Figure S7.** Photocatalytic performance of NO<sub>2</sub> production on BOI<sub>(0:100)</sub>, BOI<sub>(50:50)</sub> and BOI<sub>(100:0)</sub>.

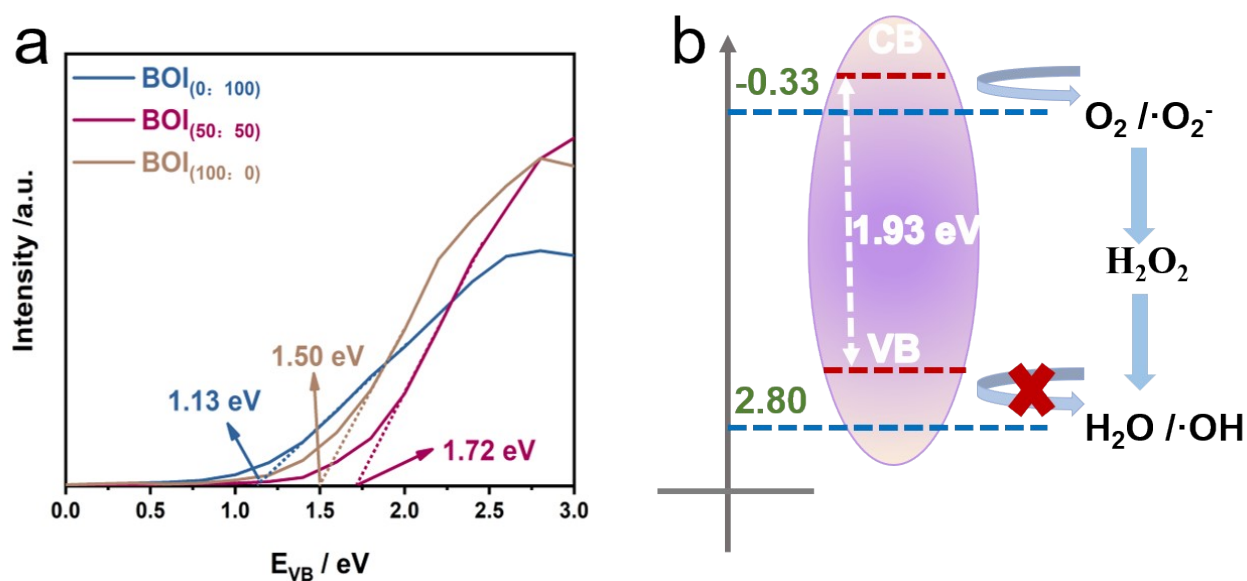

**Figure S8.** The proposed band structures of BOI<sub>(50:50)</sub> for photocatalysis mechanism.

The energy position of the valance band ( $E_{VB}$ ) of BOI<sub>(50:50)</sub> is determined by XPS results (Figure S2 (a)) and conduction band ( $E_{CB}$ ) are calculated with the following equations:

$$E_{CB} = E_{VB} - E_g \quad (S2)$$

$E_g$  stands for the gap energy of catalysts, which can be calculated with the UV-vis results shown in Figure 3a inset.

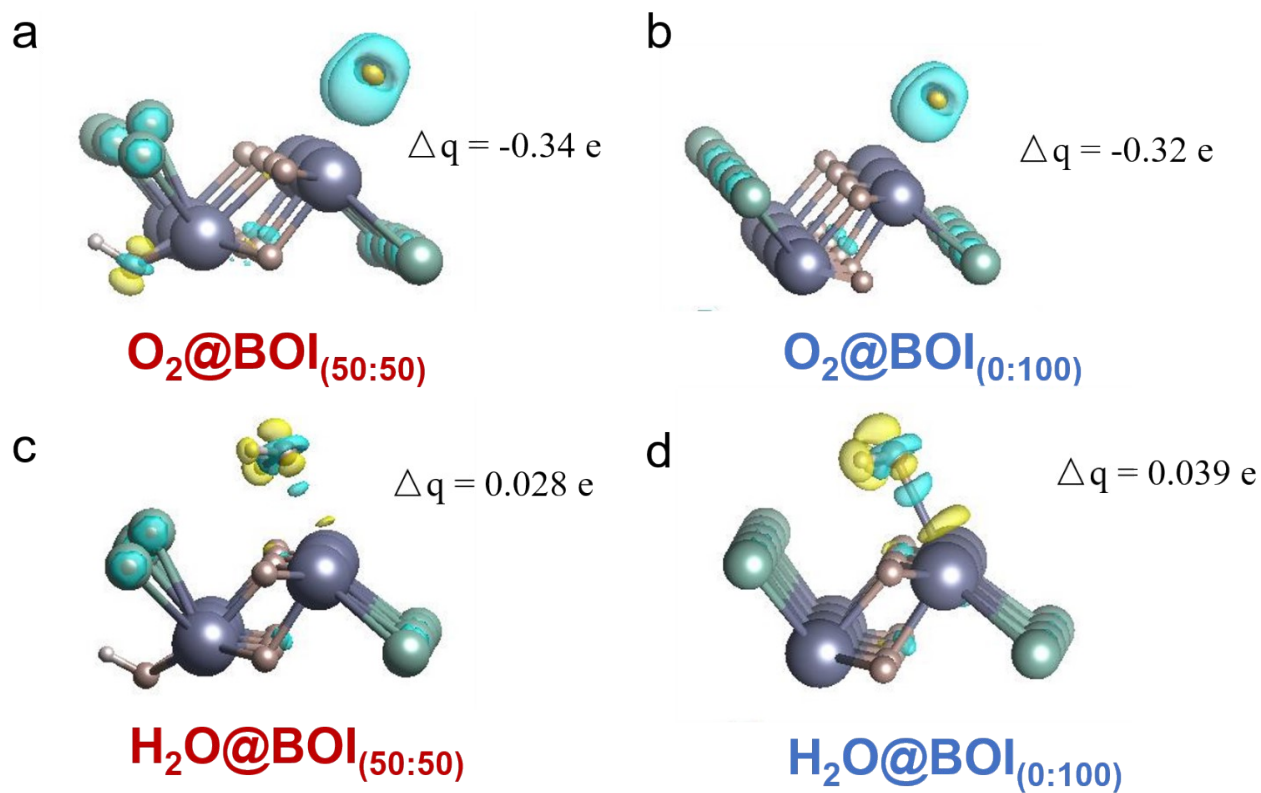

**Figure S9.** Electron transfer for O<sub>2</sub> molecules (a, b) and H<sub>2</sub>O molecules (c, d) on BOI(50:50) and BOI(0:100): charge density difference and the Bader effective charge respectively.

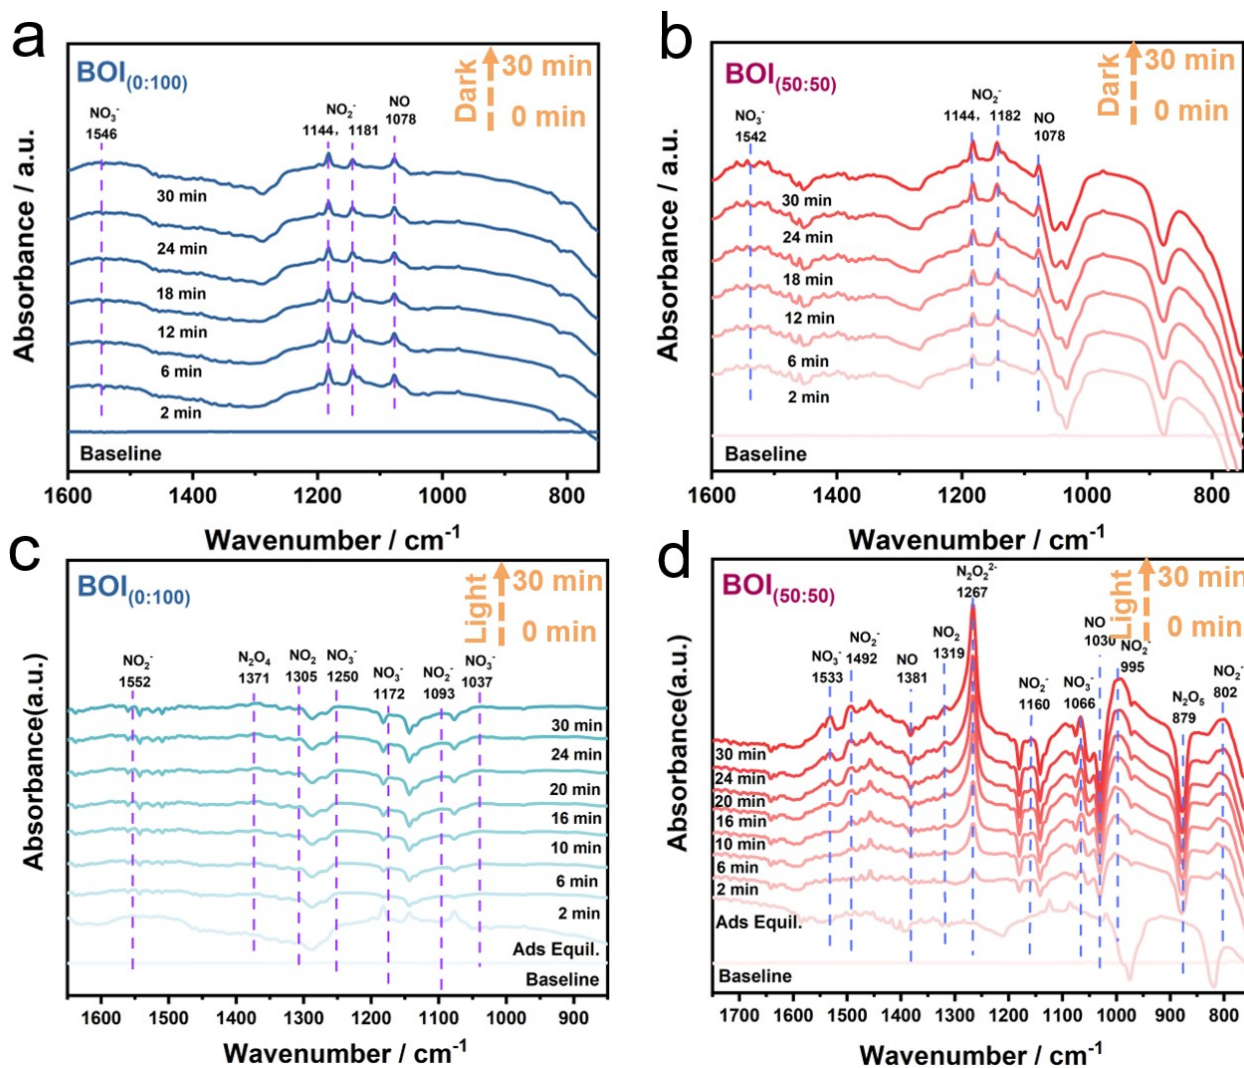

**Figure S10.** in situ DRIFTS spectra of NO adsorption processes over BOI<sub>(0:100)</sub> (a) and BOI<sub>(50:50)</sub> (b); Photocatalytic NO oxidation process over BOI<sub>(0:100)</sub> (c) and BOI<sub>(50:50)</sub> (d) under visible light irradiation (whole process).

**Table S1.** The distance of  $X_1$  and  $X_2$  in the three molecular diagrams after structure optimization with DFT calculation.

|       | $\text{BOI}_{(0,100)}$ | $\text{BOI}_{(50,50)}$ | $\text{BOI}_{(100,0)}$ |
|-------|------------------------|------------------------|------------------------|
| $X_1$ | 4.607 Å                | 4.503 Å                | 4.613 Å                |
| $X_2$ | 4.020 Å                | 3.967 Å                | 4.047 Å                |

**Table S2.** Bader charges of Bi-O bonds on  $\text{BOI}_{(0:100)}$  sample

| $\text{BOI}_{(0:100)}$ |          |          |          |          |
|------------------------|----------|----------|----------|----------|
|                        | 24-O     | 27-O     | 33-O     | 36-O     |
| 12-Bi                  | 0.430 eV | 0.438 eV | /        | /        |
| 18-Bi                  | /        | /        | 0.438 eV | 0.430 eV |
| 21-Bi                  | 0.421 eV | 0.429 eV | /        | /        |
| 33-Bi                  | /        | /        | 0.428 eV | 0.421 eV |

**Table S3.** Bader charges of Bi-O bonds on  $\text{BOI}_{(50:50)}$  sample

| $\text{BOI}_{(50:50)}$ |          |          |          |          |
|------------------------|----------|----------|----------|----------|
|                        | 24-O     | 27-O     | 33-O     | 36-O     |
| 12-Bi                  | 0.543 eV | 0.541 eV | /        | /        |
| 18-Bi                  | /        | /        | 0.551 eV | 0.557 eV |
| 21-Bi                  | 0.427 eV | 0.424 eV | /        | /        |
| 33-Bi                  | /        | /        | 0.428 eV | 0.429 eV |

**Table S4.** Comparison of NO removed performance

| Photocatalysts                                            | NO removal ratio | Light source                                   | References   |
|-----------------------------------------------------------|------------------|------------------------------------------------|--------------|
| Ba-vacancy $\text{BaSO}_4$                                | 42.0 %           | UV-light ( $\lambda = 280 \text{ nm}$ )        | [19]         |
| $\text{Bi@OV-Bi}_2\text{O}_2\text{CO}_3$                  | 40.8 %           | Visible-light( $\lambda \geq 420 \text{ nm}$ ) | [14]         |
| $\text{g-C}_3\text{N}_4\text{-Bi}_2\text{O}_2\text{CO}_3$ | 53.3 %           | Visible-light( $\lambda \geq 420 \text{ nm}$ ) | [16]         |
| Carbon vacancy- $\text{C}_3\text{N}_4$                    | 47.7 %           | Visible-light( $\lambda \geq 448 \text{ nm}$ ) | [54]         |
| O/La co-functionalization in $\text{g-C}_3\text{N}_4$     | 50.4 %           | Visible-light( $\lambda \geq 420 \text{ nm}$ ) | [12]         |
| $\text{BiOBr-SnO}_2$ heterojunctions                      | 50.3 %           | Visible-light( $\lambda \geq 420 \text{ nm}$ ) | [51]         |
| $\text{BaCO}_3\text{-BiOI}$ heterojunction                | 47.5%            | Visible-light( $\lambda \geq 420 \text{ nm}$ ) | [33]         |
| -OH intercalated BiOI                                     | 51.7 %           | Visible-light( $\lambda \geq 420 \text{ nm}$ ) | This article |



**Table S5.** Band assignment

| <b>Wava number (cm<sup>-1</sup>)</b>         | <b>Surface species</b>                      |
|----------------------------------------------|---------------------------------------------|
| 1542, 1533, 1250, 1172, 1066,1037            | NO <sub>3</sub> <sup>-</sup>                |
| 1552, 1492, 1182, 1160, 1144, 1093, 995, 802 | NO <sub>2</sub> <sup>-</sup>                |
| 1381, 1078, 1030                             | NO                                          |
| 1371                                         | N <sub>2</sub> O <sub>4</sub>               |
| 1319,1305                                    | NO <sub>2</sub>                             |
| 1267                                         | N <sub>2</sub> O <sub>2</sub> <sup>2-</sup> |
| 879                                          | N <sub>2</sub> O <sub>5</sub>               |
